# Supplementary material
Source: PubMed Central journal article supplement (PMC6637938)
Supplement: NIHMS1031791-supplement-Supplemental_Table_6.pdf [file NIHMS1031791-supplement-Supplemental_Table_6.pdf]

MMP12 Elastin Human Aorta LC-MS/MS Proteomics.

| MS/MS sample name              | Protein name | Gene Symbol | Protein accession number | Protein molecular weight (kDa) | Protein identification probability | Exclusive unique peptide count | Exclusive unique spectrum count | Exclusive unique spectrum count | Percentage total sequence coverage | Percentage total sequence coverage | Peptide sequence | Previous amino acid | Next amino acid | Best Peptide probability | Best SEQUEST XCorr score | Best SEQUEST DC score | Number of identified +1H spectra | Number of identified +2H spectra | Number of identified +3H spectra | Number of identified +4H spectra | Calculated +1H Peptide Mass (AMU) | Total TIC |
|--------------------------------|--------------|-------------|--------------------------|--------------------------------|------------------------------------|--------------------------------|---------------------------------|---------------------------------|------------------------------------|------------------------------------|------------------|---------------------|-----------------|--------------------------|--------------------------|-----------------------|----------------------------------|----------------------------------|----------------------------------|----------------------------------|-----------------------------------|-----------|
| 082817_S1 Isoform 2 of Elastin | Elastin      | ELN         | sp P15502-2 ELN          | 62632.4                        | 100.00%                            | 266                            | 325                             | 740                             | 2.25%                              | 58.60%                             | KVPGVGLPG        | G                   | V               | 99.70%                   | 2.14                     | 0.550                 | 0                                | 1                                | 0                                | 0                                | 823.5038                          | 7.83E+05  |
| 082817_S1 Isoform 2 of Elastin | Elastin      | ELN         | sp P15502-2 ELN          | 62632.4                        | 100.00%                            | 266                            | 325                             | 740                             | 2.25%                              | 58.60%                             | VRGVVSPFA        | A                   | V               | 99.70%                   | 2.29                     | 0.486                 | 2                                | 0                                | 0                                | 0                                | 854.4618                          | 3.58E+06  |
| 082817_S1 Isoform 2 of Elastin | Elastin      | ELN         | sp P15502-2 ELN          | 62632.4                        | 100.00%                            | 266                            | 325                             | 740                             | 2.25%                              | 58.60%                             | AFVAVTFPG        | G                   | A               | 99.70%                   | 2.06                     | 0.597                 | 2                                | 0                                | 0                                | 0                                | 906.4720                          | 3.25E+06  |
| 082817_S1 Isoform 2 of Elastin | Elastin      | ELN         | sp P15502-2 ELN          | 62632.4                        | 100.00%                            | 266                            | 325                             | 740                             | 2.25%                              | 58.60%                             | VLLGGALGGV       | G                   | G               | 99.70%                   | 2.15                     | 0.388                 | 1                                | 0                                | 0                                | 0                                | 912.5515                          | 4.41E+05  |
| 082817_S1 Isoform 2 of Elastin | Elastin      | ELN         | sp P15502-2 ELN          | 62632.4                        | 100.00%                            | 266                            | 325                             | 740                             | 2.25%                              | 58.60%                             | AIPIGGIAGV       | G                   | G               | 99.70%                   | 2.78                     | 0.420                 | 0                                | 2                                | 0                                | 0                                | 924.5515                          | 3.37E+05  |
| 082817_S1 Isoform 2 of Elastin | Elastin      | ELN         | sp P15502-2 ELN          | 62632.4                        | 100.00%                            | 266                            | 325                             | 740                             | 2.25%                              | 58.60%                             | VPGVVSPFAA       | A                   | A               | 99.70%                   | 2.44                     | 0.405                 | 1                                | 0                                | 0                                | 0                                | 925.4989                          | 8.65E+04  |
| 082817_S1 Isoform 2 of Elastin | Elastin      | ELN         | sp P15502-2 ELN          | 62632.4                        | 100.00%                            | 266                            | 325                             | 740                             | 2.25%                              | 58.60%                             | GVVPGAGLG        | G                   | A               | 99.70%                   | 2.00                     | 0.437                 | 1                                | 0                                | 0                                | 0                                | 937.4779                          | 7.90E+06  |
| 082817_S1 Isoform 2 of Elastin | Elastin      | ELN         | sp P15502-2 ELN          | 62632.4                        | 100.00%                            | 266                            | 325                             | 740                             | 2.25%                              | 58.60%                             | GVVPGVGVGGV      | A                   | G               | 99.70%                   | 2.47                     | 0.503                 | 5                                | 0                                | 0                                | 0                                | 950.4732                          | 4.65E+07  |
| 082817_S1 Isoform 2 of Elastin | Elastin      | ELN         | sp P15502-2 ELN          | 62632.4                        | 100.00%                            | 266                            | 325                             | 740                             | 2.25%                              | 58.60%                             | LVVPGVGGV        | K                   | A               | 99.70%                   | 2.48                     | 0.519                 | 2                                | 0                                | 0                                | 0                                | 979.4885                          | 4.10E+06  |
| 082817_S1 Isoform 2 of Elastin | Elastin      | ELN         | sp P15502-2 ELN          | 62632.4                        | 100.00%                            | 266                            | 325                             | 740                             | 2.25%                              | 58.60%                             | AIPIGGIAGV       | G                   | T               | 99.70%                   | 2.60                     | 0.555                 | 0                                | 2                                | 0                                | 0                                | 981.5730                          | 1.73E+06  |
| 082817_S1 Isoform 2 of Elastin | Elastin      | ELN         | sp P15502-2 ELN          | 62632.4                        | 100.00%                            | 266                            | 325                             | 740                             | 2.25%                              | 58.60%                             | FGLSIFPFG        | G                   | A               | 99.70%                   | 2.12                     | 0.439                 | 3                                | 0                                | 0                                | 0                                | 991.5249                          | 1.03E+07  |
| 082817_S1 Isoform 2 of Elastin | Elastin      | ELN         | sp P15502-2 ELN          | 62632.4                        | 100.00%                            | 266                            | 325                             | 740                             | 2.25%                              | 58.60%                             | PGVGGIAGP        | V                   | A               | 99.70%                   | 2.01                     | 0.323                 | 4                                | 0                                | 0                                | 0                                | 991.5574                          | 3.91E+05  |
| 082817_S1 Isoform 2 of Elastin | Elastin      | ELN         | sp P15502-2 ELN          | 62632.4                        | 100.00%                            | 266                            | 325                             | 740                             | 2.25%                              | 58.60%                             | GVVPGVGVGGV      | A                   | I               | 99.70%                   | 2.29                     | 0.384                 | 1                                | 0                                | 0                                | 0                                | 1007.4947                         | 1.59E+06  |
| 082817_S1 Isoform 2 of Elastin | Elastin      | ELN         | sp P15502-2 ELN          | 62632.4                        | 100.00%                            | 266                            | 325                             | 740                             | 2.25%                              | 58.60%                             | GVLLGAGQFPL      | G                   | G               | 99.70%                   | 2.17                     | 0.511                 | 2                                | 0                                | 0                                | 0                                | 1016.5414                         | 3.01E+06  |
| 082817_S1 Isoform 2 of Elastin | Elastin      | ELN         | sp P15502-2 ELN          | 62632.4                        | 100.00%                            | 266                            | 325                             | 740                             | 2.25%                              | 58.60%                             | FAGIPGVVFG       | A                   | G               | 99.70%                   | 2.14                     | 0.534                 | 2                                | 0                                | 0                                | 0                                | 1018.5358                         | 2.19E+06  |
| 082817_S1 Isoform 2 of Elastin | Elastin      | ELN         | sp P15502-2 ELN          | 62632.4                        | 100.00%                            | 266                            | 325                             | 740                             | 2.25%                              | 58.60%                             | PGVGGIAGP        | V                   | A               | 99.70%                   | 2.11                     | 0.456                 | 1                                | 0                                | 0                                | 0                                | 1026.5104                         | 5.79E+05  |
| 082817_S1 Isoform 2 of Elastin | Elastin      | ELN         | sp P15502-2 ELN          | 62632.4                        | 100.00%                            | 266                            | 325                             | 740                             | 2.25%                              | 58.60%                             | ALGVGIPGGV       | G                   | A               | 99.70%                   | 2.20                     | 0.396                 | 3                                | 0                                | 0                                | 0                                | 1052.6101                         | 1.05E+07  |
| 082817_S1 Isoform 2 of Elastin | Elastin      | ELN         | sp P15502-2 ELN          | 62632.4                        | 100.00%                            | 266                            | 325                             | 740                             | 2.25%                              | 58.60%                             | GLVSVAGVVPQ      | G                   | P               | 99.70%                   | 2.00                     | 0.434                 | 2                                | 0                                | 0                                | 0                                | 1055.5733                         | 3.07E+06  |
| 082817_S1 Isoform 2 of Elastin | Elastin      | ELN         | sp P15502-2 ELN          | 62632.4                        | 100.00%                            | 266                            | 325                             | 740                             | 2.25%                              | 58.60%                             | LVGAGVGVPPGV     | G                   | V               | 99.70%                   | 2.34                     | 0.439                 | 1                                | 0                                | 0                                | 0                                | 1066.6258                         | 1.96E+06  |
| 082817_S1 Isoform 2 of Elastin | Elastin      | ELN         | sp P15502-2 ELN          | 62632.4                        | 100.00%                            | 266                            | 325                             | 740                             | 2.25%                              | 58.60%                             | VVPGVGVSPF       | G                   | A               | 99.70%                   | 2.29                     | 0.405                 | 0                                | 0                                | 0                                | 0                                | 1067.5733                         | 1.56E+06  |
| 082817_S1 Isoform 2 of Elastin | Elastin      | ELN         | sp P15502-2 ELN          | 62632.4                        | 100.00%                            | 266                            | 325                             | 740                             | 2.25%                              | 58.60%                             | ARFPGVGLPG       | G                   | V               | 99.70%                   | 2.02                     | 0.452                 | 0                                | 1                                | 0                                | 0                                | 1069.6154                         | 6.15E+07  |
| 082817_S1 Isoform 2 of Elastin | Elastin      | ELN         | sp P15502-2 ELN          | 62632.4                        | 100.00%                            | 266                            | 325                             | 740                             | 2.25%                              | 58.60%                             | GVLLGAGQFPL      | L                   | G               | 99.70%                   | 2.31                     | 0.442                 | 2                                | 2                                | 0                                | 0                                | 1073.5629                         | 1.75E+06  |
| 082817_S1 Isoform 2 of Elastin | Elastin      | ELN         | sp P15502-2 ELN          | 62632.4                        | 100.00%                            | 266                            | 325                             | 740                             | 2.25%                              | 58.60%                             | FAGIPGVVFG       | A                   | P               | 99.70%                   | 2.41                     | 0.477                 | 3                                | 0                                | 0                                | 0                                | 1075.5573                         | 1.59E+06  |
| 082817_S1 Isoform 2 of Elastin | Elastin      | ELN         | sp P15502-2 ELN          | 62632.4                        | 100.00%                            | 266                            | 325                             | 740                             | 2.25%                              | 58.60%                             | LVGVPVPLGV       | G                   | A               | 99.70%                   | 2.26                     | 0.391                 | 1                                | 0                                | 0                                | 0                                | 1080.6414                         | 5.55E+05  |
| 082817_S1 Isoform 2 of Elastin | Elastin      | ELN         | sp P15502-2 ELN          | 62632.4                        | 100.00%                            | 266                            | 325                             | 740                             | 2.25%                              | 58.60%                             | AGLVPGVGGV       | A                   | V               | 99.70%                   | 2.30                     | 0.490                 | 0                                | 2                                | 0                                | 0                                | 1082.5632                         | 2.43E+06  |
| 082817_S1 Isoform 2 of Elastin | Elastin      | ELN         | sp P15502-2 ELN          | 62632.4                        | 100.00%                            | 266                            | 325                             | 740                             | 2.25%                              | 58.60%                             | YVGGAGVGGV       | T                   | V               | 99.70%                   | 2.22                     | 0.410                 | 1                                | 0                                | 0                                | 0                                | 1085.5052                         | 3.73E+05  |
| 082817_S1 Isoform 2 of Elastin | Elastin      | ELN         | sp P15502-2 ELN          | 62632.4                        | 100.00%                            | 266                            | 325                             | 740                             | 2.25%                              | 58.60%                             | AARPGFLSPI       | V                   | F               | 99.70%                   | 2.83                     | 0.420                 | 0                                | 3                                | 0                                | 0                                | 1085.6103                         | 3.67E+07  |
| 082817_S1 Isoform 2 of Elastin | Elastin      | ELN         | sp P15502-2 ELN          | 62632.4                        | 100.00%                            | 266                            | 325                             | 740                             | 2.25%                              | 58.60%                             | RVGFLSPF         | A                   | P               | 99.70%                   | 2.14                     | 0.514                 | 0                                | 0                                | 0                                | 0                                | 1090.6045                         | 9.07E+04  |
| 082817_S1 Isoform 2 of Elastin | Elastin      | ELN         | sp P15502-2 ELN          | 62632.4                        | 100.00%                            | 266                            | 325                             | 740                             | 2.25%                              | 58.60%                             | FPGALVGGVAD      | T                   | A               | 99.70%                   | 2.32                     | 0.570                 | 6                                | 0                                | 0                                | 0                                | 1099.5784                         | 5.07E+06  |
| 082817_S1 Isoform 2 of Elastin | Elastin      | ELN         | sp P15502-2 ELN          | 62632.4                        | 100.00%                            | 266                            | 325                             | 740                             | 2.25%                              | 58.60%                             | AGVPPVPGAGV      | A                   | A               | 99.70%                   | 2.22                     | 0.412                 | 2                                | 0                                | 0                                | 0                                | 1104.6414                         | 1.92E+07  |
| 082817_S1 Isoform 2 of Elastin | Elastin      | ELN         | sp P15502-2 ELN          | 62632.4                        | 100.00%                            | 266                            | 325                             | 740                             | 2.25%                              | 58.60%                             | VVPGVGGVGGV      | G                   | L               | 99.70%                   | 2.13                     | 0.399                 | 1                                | 0                                | 0                                | 0                                | 1108.5788                         | 5.22E+06  |
| 082817_S1 Isoform 2 of Elastin | Elastin      | ELN         | sp P15502-2 ELN          | 62632.4                        | 100.00%                            | 266                            | 325                             | 740                             | 2.25%                              | 58.60%                             | GALGVGIPGGV      | L                   | A               | 99.70%                   | 2.42                     | 0.524                 | 1                                | 0                                | 0                                | 0                                | 1109.6316                         | 2.15E+06  |
| 082817_S1 Isoform 2 of Elastin | Elastin      | ELN         | sp P15502-2 ELN          | 62632.4                        | 100.00%                            | 266                            | 325                             | 740                             | 2.25%                              | 58.60%                             | GLVPGVGGV        | A                   | V               | 99.70%                   | 2.43                     | 0.242                 | 6                                | 4                                | 0                                | 0                                | 1110.5945                         | 1.26E+08  |
| 082817_S1 Isoform 2 of Elastin | Elastin      | ELN         | sp P15502-2 ELN          | 62632.4                        | 100.00%                            | 266                            | 325                             | 740                             | 2.25%                              | 58.60%                             | VVPGVGGV         | G                   | A               | 99.70%                   | 2.23                     | 0.452                 | 0                                | 1                                | 0                                | 0                                | 1118.6570                         | 4.19E+06  |
| 082817_S1 Isoform 2 of Elastin | Elastin      | ELN         | sp P15502-2 ELN          | 62632.4                        | 100.00%                            | 266                            | 325                             | 740                             | 2.25%                              | 58.60%                             | VGGAGVGGV        | G                   | G               | 99.70%                   | 2.03                     | 0.439                 | 1                                | 0                                | 0                                | 0                                | 1120.5787                         | 7.55E+05  |
| 082817_S1 Isoform 2 of Elastin | Elastin      | ELN         | sp P15502-2 ELN          | 62632.4                        | 100.00%                            | 266                            | 325                             | 740                             | 2.25%                              | 58.60%                             | GLGALGVGGV       | G                   | V               | 99.70%                   | 3.04                     | 0.435                 | 0                                | 1                                | 0                                | 0                                | 1123.6473                         | 6.88E+05  |
| 082817_S1 Isoform 2 of Elastin | Elastin      | ELN         | sp P15502-2 ELN          | 62632.4                        | 100.00%                            | 266                            | 325                             | 740                             | 2.25%                              | 58.60%                             | VPGVGLSPFA       | A                   | A               | 99.70%                   | 2.05                     | 0.558                 | 3                                | 1                                | 0                                | 0                                | 1125.5788                         | 1.19E+07  |
| 082817_S1 Isoform 2 of Elastin | Elastin      | ELN         | sp P15502-2 ELN          | 62632.4                        | 100.00%                            | 266                            | 325                             | 740                             | 2.25%                              | 58.60%                             | GLGVLGGAGQFP     | A                   | L               | 99.70%                   | 2.66                     | 0.585                 | 2                                | 0                                | 0                                | 0                                | 1130.5844                         | 1.53E+07  |
| 082817_S1 Isoform 2 of Elastin | Elastin      | ELN         | sp P15502-2 ELN          | 62632.4                        | 100.00%                            | 266                            | 325                             | 740                             | 2.25%                              | 58.60%                             | GLGAVVTFPG       | A                   | A               | 99.70%                   | 3.03                     | 0.689                 | 0                                | 2                                | 0                                | 0                                | 1133.5991                         | 9.46E+05  |
| 082817_S1 Isoform 2 of Elastin | Elastin      | ELN         | sp P15502-2 ELN          | 62632.4                        | 100.00%                            | 266                            | 325                             | 740                             | 2.25%                              | 58.60%                             | VGGVGLVGGV       | A                   | Q               | 99.70%                   | 2.38                     | 0.503                 | 3                                | 0                                | 0                                | 0                                | 1135.6104                         | 1.46E+07  |
| 082817_S1 Isoform 2 of Elastin | Elastin      | ELN         | sp P15502-2 ELN          | 62632.4                        | 100.00%                            | 266                            | 325                             | 740                             | 2.25%                              | 58.60%                             | FPVGGVGLPG       | R                   | G               | 99.70%                   | 2.20                     | 0.590                 | 9                                | 0                                | 0                                | 0                                | 1139.6461                         | 1.20E+08  |
| 082817_S1 Isoform 2 of Elastin | Elastin      | ELN         | sp P15502-2 ELN          | 62632.4                        | 100.00%                            | 266                            | 325                             | 740                             | 2.25%                              | 58.60%                             | AFAGIPGVVFG      | G                   | P               | 99.70%                   | 2.14                     | 0.507                 | 1                                | 0                                | 0                                | 0                                | 1146.5944                         | 1.33E+05  |
| 082817_S1 Isoform 2 of Elastin | Elastin      | ELN         | sp P15502-2 ELN          | 62632.4                        | 100.00%                            | 266                            | 325                             | 740                             | 2.25%                              | 58.60%                             | VVPGVGGV         | A                   | I               | 99.70%                   | 2.42                     | 0.414                 | 2                                | 0                                | 0                                | 0                                | 1147.6473                         | 6.28E+05  |
| 082817_S1 Isoform 2 of Elastin | Elastin      | ELN         | sp P15502-2 ELN          | 62632.4                        | 100.00%                            | 266                            | 325                             | 740                             | 2.25%                              | 58.60%                             | VVPGVGGVGGV      | L                   | A               | 99.70%                   | 3.47                     | 0.562                 | 0                                | 5                                | 0                                | 0                                | 1147.6473                         | 3.71E+07  |
| 082817_S1 Isoform 2 of Elastin | Elastin      | ELN         | sp P15502-2 ELN          | 62632.4                        | 100.00%                            | 266                            | 325                             | 740                             | 2.25%                              | 58.60%                             | LVGVLGGVGGV      | G                   | G               | 99.70%                   | 2.13                     | 0.454                 | 1                                | 0                                | 0                                | 0                                | 1151.6786                         | 1.09E+05  |
| 082817_S1 Isoform 2 of Elastin | Elastin      | ELN         | sp P15502-2 ELN          | 62632.4                        | 100.00%                            | 266                            | 325                             | 740                             | 2.25%                              | 58.60%                             | AGLVPGVGGV       | A                   | V               | 99.70%                   | 2.35                     | 0.493                 | 0                                | 2                                | 0                                | 0                                | 1153.6003                         | 1.60E+06  |
| 082817_S1 Isoform 2 of Elastin | Elastin      | ELN         | sp P15502-2 ELN          | 62632.4                        | 100.00%                            | 266                            | 325                             | 740                             | 2.25%                              | 58.60%                             | GLGALGVGGV       | G                   | K               | 99.70%                   | 2.79                     | 0.349                 | 0                                | 1                                | 0                                | 0                                | 1164.6739                         | 3.68E+05  |
| 082817_S1 Isoform 2 of Elastin | Elastin      | ELN         | sp P15502-2 ELN          | 62632.4                        | 100.00%                            | 266                            | 325                             | 740                             | 2.25%                              | 58.60%                             | VVPGVGGV         | P                   | L               | 99.70%                   | 2.20                     | 0.415                 | 1                                | 0                                | 0                                | 0                                | 1166.5844                         | 3.12E+06  |
| 082817_S1 Isoform 2 of Elastin | Elastin      | ELN         | sp P15502-2 ELN          | 62632.4                        | 100.00%                            | 266                            |                                 |                                 |                                    |                                    |                  |                     |                 |                          |                          |                       |                                  |                                  |                                  |                                  |                                   |           |



|                                |     |                 |         |         |     |     |     |       |        |                           |   |   |        |      |       |   |   |   |   |           |          |
|--------------------------------|-----|-----------------|---------|---------|-----|-----|-----|-------|--------|---------------------------|---|---|--------|------|-------|---|---|---|---|-----------|----------|
| 082817_S4 Isoform 2 of Elastin | ELN | sp P15502-2 ELN | 62632.4 | 100.00% | 266 | 325 | 740 | 2.25% | 58.60% | GVPGVGVGAGIPVPPVGGIPG     | A | A | 99.70% | 3.92 | 0.561 | 0 | 4 | 0 | 0 | 1824.0382 | 1.92E+07 |
| 082817_S4 Isoform 2 of Elastin | ELN | sp P15502-2 ELN | 62632.4 | 100.00% | 266 | 325 | 740 | 2.25% | 58.60% | VGGAGVPGVPAIPGGIAGVG      | G | T | 99.70% | 2.78 | 0.346 | 0 | 1 | 0 | 0 | 1829.0284 | 4.86E+05 |
| 082817_S4 Isoform 2 of Elastin | ELN | sp P15502-2 ELN | 62632.4 | 100.00% | 266 | 325 | 740 | 2.25% | 58.60% | AFAGIPGVFPFGQPQVPL        | G | G | 99.70% | 2.64 | 0.487 | 0 | 2 | 0 | 0 | 1834.9854 | 7.94E+05 |
| 082817_S4 Isoform 2 of Elastin | ELN | sp P15502-2 ELN | 62632.4 | 100.00% | 266 | 325 | 740 | 2.25% | 58.60% | VPGVGVGAGIPVPPVGGIPG      | G | A | 99.70% | 2.36 | 0.525 | 0 | 2 | 0 | 0 | 1838.0538 | 1.76E+06 |
| 082817_S4 Isoform 2 of Elastin | ELN | sp P15502-2 ELN | 62632.4 | 100.00% | 266 | 325 | 740 | 2.25% | 58.60% | GVPGVGVGAGIPVPPVGGIPG     | A | A | 99.70% | 4.38 | 0.457 | 0 | 5 | 0 | 0 | 1843.9916 | 4.02E+07 |
| 082817_S4 Isoform 2 of Elastin | ELN | sp P15502-2 ELN | 62632.4 | 100.00% | 266 | 325 | 740 | 2.25% | 58.60% | VPGVGVGAGIPVPPVGGIPG      | G | Q | 99.70% | 3.84 | 0.468 | 0 | 3 | 0 | 0 | 1858.0072 | 4.19E+06 |
| 082817_S4 Isoform 2 of Elastin | ELN | sp P15502-2 ELN | 62632.4 | 100.00% | 266 | 325 | 740 | 2.25% | 58.60% | GVGVGVGAGIPVPPVGGIPG      | P | A | 99.70% | 3.62 | 0.518 | 0 | 1 | 0 | 0 | 1861.9658 | 1.47E+06 |
| 082817_S4 Isoform 2 of Elastin | ELN | sp P15502-2 ELN | 62632.4 | 100.00% | 266 | 325 | 740 | 2.25% | 58.60% | LGGLGVGLVPGVGLGGIPPA      | G | A | 99.70% | 3.54 | 0.533 | 0 | 3 | 0 | 0 | 1871.0755 | 2.10E+06 |
| 082817_S4 Isoform 2 of Elastin | ELN | sp P15502-2 ELN | 62632.4 | 100.00% | 266 | 325 | 740 | 2.25% | 58.60% | GVPGVGVGAGIPVPPVGGIPG     | V | G | 99.70% | 4.41 | 0.331 | 0 | 2 | 0 | 0 | 1881.0596 | 1.13E+07 |
| 082817_S4 Isoform 2 of Elastin | ELN | sp P15502-2 ELN | 62632.4 | 100.00% | 266 | 325 | 740 | 2.25% | 58.60% | GVPGVGVGAGIPVPPVGGIPG     | A | A | 99.70% | 3.03 | 0.286 | 0 | 1 | 0 | 0 | 1895.0753 | 2.53E+06 |
| 082817_S4 Isoform 2 of Elastin | ELN | sp P15502-2 ELN | 62632.4 | 100.00% | 266 | 325 | 740 | 2.25% | 58.60% | AGVPGVGVGAGIPVPPVGGIPG    | G | A | 99.70% | 3.65 | 0.504 | 0 | 7 | 0 | 0 | 1895.0753 | 3.48E+07 |
| 082817_S4 Isoform 2 of Elastin | ELN | sp P15502-2 ELN | 62632.4 | 100.00% | 266 | 325 | 740 | 2.25% | 58.60% | GVPGVGVGAGIPVPPVGGIPG     | A | Q | 99.70% | 4.52 | 0.572 | 0 | 8 | 0 | 0 | 1915.0287 | 4.60E+07 |
| 082817_S4 Isoform 2 of Elastin | ELN | sp P15502-2 ELN | 62632.4 | 100.00% | 266 | 325 | 740 | 2.25% | 58.60% | GLGLGVGLVPGVGLGGIPPA      | A | A | 99.70% | 4.12 | 0.524 | 0 | 6 | 0 | 0 | 1928.0970 | 9.36E+06 |
| 082817_S4 Isoform 2 of Elastin | ELN | sp P15502-2 ELN | 62632.4 | 100.00% | 266 | 325 | 740 | 2.25% | 58.60% | GVPGVGVGAGIPVPPVGGIPG     | V | I | 99.70% | 3.10 | 0.411 | 0 | 2 | 0 | 0 | 1938.0811 | 2.95E+06 |
| 082817_S4 Isoform 2 of Elastin | ELN | sp P15502-2 ELN | 62632.4 | 100.00% | 266 | 325 | 740 | 2.25% | 58.60% | VGVPGVGVGAGIPVPPVGGIPG    | G | G | 99.70% | 3.14 | 0.481 | 0 | 2 | 0 | 0 | 1951.1378 | 1.51E+06 |
| 082817_S4 Isoform 2 of Elastin | ELN | sp P15502-2 ELN | 62632.4 | 100.00% | 266 | 325 | 740 | 2.25% | 58.60% | GAGVPGVGVGAGIPVPPVGGIPG   | P | A | 99.70% | 3.94 | 0.405 | 0 | 1 | 0 | 0 | 1952.0968 | 1.46E+06 |
| 082817_S4 Isoform 2 of Elastin | ELN | sp P15502-2 ELN | 62632.4 | 100.00% | 266 | 325 | 740 | 2.25% | 58.60% | PGVGVGVGAGIPVPPVGGIPG     | V | A | 99.70% | 2.39 | 0.482 | 0 | 1 | 0 | 0 | 1959.0186 | 8.68E+05 |
| 082817_S4 Isoform 2 of Elastin | ELN | sp P15502-2 ELN | 62632.4 | 100.00% | 266 | 325 | 740 | 2.25% | 58.60% | AGVPGVGVGAGIPVPPVGGIPG    | G | A | 99.70% | 3.58 | 0.371 | 0 | 3 | 0 | 0 | 1966.1124 | 9.50E+06 |
| 082817_S4 Isoform 2 of Elastin | ELN | sp P15502-2 ELN | 62632.4 | 100.00% | 266 | 325 | 740 | 2.25% | 58.60% | GVLPVGVGAGIPVPPVGGIPG     | A | A | 99.70% | 2.57 | 0.350 | 0 | 1 | 0 | 0 | 1968.1282 | 2.06E+05 |
| 082817_S4 Isoform 2 of Elastin | ELN | sp P15502-2 ELN | 62632.4 | 100.00% | 266 | 325 | 740 | 2.25% | 58.60% | AGLVGVGVGLVSGAVVPPQPG     | G | A | 99.70% | 2.53 | 0.394 | 0 | 1 | 0 | 0 | 1974.0659 | 4.16E+05 |
| 082817_S4 Isoform 2 of Elastin | ELN | sp P15502-2 ELN | 62632.4 | 100.00% | 266 | 325 | 740 | 2.25% | 58.60% | AGLVGVGVGLVSGAVVPPQPG     | A | A | 99.70% | 3.80 | 0.530 | 0 | 5 | 0 | 0 | 1999.1341 | 1.55E+07 |
| 082817_S4 Isoform 2 of Elastin | ELN | sp P15502-2 ELN | 62632.4 | 100.00% | 266 | 325 | 740 | 2.25% | 58.60% | VGVPGVGVGAGIPVPPVGGIPG    | G | A | 99.70% | 2.69 | 0.509 | 0 | 5 | 1 | 0 | 2008.1593 | 3.69E+07 |
| 082817_S4 Isoform 2 of Elastin | ELN | sp P15502-2 ELN | 62632.4 | 100.00% | 266 | 325 | 740 | 2.25% | 58.60% | GAGLVGVGVGLVSGAVVPPQPG    | A | A | 99.70% | 2.23 | 0.484 | 0 | 1 | 0 | 0 | 2031.0874 | 4.31E+05 |
| 082817_S4 Isoform 2 of Elastin | ELN | sp P15502-2 ELN | 62632.4 | 100.00% | 266 | 325 | 740 | 2.25% | 58.60% | GVPGVGVGAGIPVPPVGGIPG     | A | A | 99.70% | 3.03 | 0.604 | 0 | 2 | 0 | 0 | 2044.0714 | 2.27E+06 |
| 082817_S4 Isoform 2 of Elastin | ELN | sp P15502-2 ELN | 62632.4 | 100.00% | 266 | 325 | 740 | 2.25% | 58.60% | PGVGVGVGAGIPVPPVGGIPG     | V | A | 99.70% | 2.96 | 0.401 | 0 | 1 | 0 | 0 | 2049.1496 | 6.60E+05 |
| 082817_S4 Isoform 2 of Elastin | ELN | sp P15502-2 ELN | 62632.4 | 100.00% | 266 | 325 | 740 | 2.25% | 58.60% | VPGVGVGAGIPVPPVGGIPG      | G | A | 99.70% | 4.29 | 0.613 | 0 | 3 | 0 | 0 | 2058.0870 | 1.29E+07 |
| 082817_S4 Isoform 2 of Elastin | ELN | sp P15502-2 ELN | 62632.4 | 100.00% | 266 | 325 | 740 | 2.25% | 58.60% | GVVPGVGVGAGIPVPPVGGIPG    | P | A | 99.70% | 3.10 | 0.441 | 0 | 3 | 0 | 0 | 2065.1808 | 4.34E+06 |
| 082817_S4 Isoform 2 of Elastin | ELN | sp P15502-2 ELN | 62632.4 | 100.00% | 266 | 325 | 740 | 2.25% | 58.60% | AAVLGVGLVGVGAGIPVPPVGGIPG | G | A | 99.70% | 2.36 | 0.557 | 0 | 1 | 0 | 0 | 2070.1712 | 1.87E+05 |
| 082817_S4 Isoform 2 of Elastin | ELN | sp P15502-2 ELN | 62632.4 | 100.00% | 266 | 325 | 740 | 2.25% | 58.60% | VGVPGVGVGAGIPVPPVGGIPG    | G | G | 99.70% | 2.46 | 0.394 | 0 | 1 | 0 | 0 | 2079.1964 | 7.08E+05 |
| 082817_S4 Isoform 2 of Elastin | ELN | sp P15502-2 ELN | 62632.4 | 100.00% | 266 | 325 | 740 | 2.25% | 58.60% | VAGVPGVGVGAGIPVPPVGGIPG   | G | Q | 99.70% | 3.98 | 0.563 | 0 | 2 | 0 | 0 | 2085.1342 | 2.56E+06 |
| 082817_S4 Isoform 2 of Elastin | ELN | sp P15502-2 ELN | 62632.4 | 100.00% | 266 | 325 | 740 | 2.25% | 58.60% | GVPGVGVGAGIPVPPVGGIPG     | A | A | 99.70% | 4.06 | 0.630 | 0 | 6 | 0 | 0 | 2115.1085 | 2.39E+07 |
| 082817_S4 Isoform 2 of Elastin | ELN | sp P15502-2 ELN | 62632.4 | 100.00% | 266 | 325 | 740 | 2.25% | 58.60% | VAGVPGVGVGAGIPVPPVGGIPG   | G | A | 99.70% | 2.73 | 0.319 | 0 | 0 | 1 | 0 | 2285.2140 | 2.97E+05 |
| 082817_S4 Isoform 2 of Elastin | ELN | sp P15502-2 ELN | 62632.4 | 100.00% | 266 | 325 | 740 | 2.25% | 58.60% | VAGVPGVGVGAGIPVPPVGGIPG   | G | A | 99.70% | 4.68 | 0.459 | 0 | 4 | 0 | 0 | 2014.0971 | 1.11E+07 |
| 082817_S4 Isoform 2 of Elastin | ELN | sp P15502-2 ELN | 62632.4 | 100.00% | 266 | 325 | 740 | 2.25% | 58.60% | RPVGVGGIPT                | A | Y | 99.70% | 1.74 | 0.839 | 0 | 1 | 0 | 0 | 1009.5791 | 3.30E+06 |
| 082817_S4 Isoform 2 of Elastin | ELN | sp P15502-2 ELN | 62632.4 | 100.00% | 266 | 325 | 740 | 2.25% | 58.60% | ARPGFGLSP                 | A | F | 99.70% | 1.97 | 0.407 | 0 | 5 | 0 | 0 | 1014.5732 | 1.31E+08 |
| 082817_S4 Isoform 2 of Elastin | ELN | sp P15502-2 ELN | 62632.4 | 100.00% | 266 | 325 | 740 | 2.25% | 58.60% | GVLVGGAGFP                | G | G | 99.70% | 1.84 | 0.438 | 0 | 1 | 0 | 0 | 1073.5629 | 4.85E+04 |
| 082817_S4 Isoform 2 of Elastin | ELN | sp P15502-2 ELN | 62632.4 | 100.00% | 266 | 325 | 740 | 2.25% | 58.60% | LVGGALVGGKPL              | A | K | 99.70% | 1.97 | 0.162 | 0 | 1 | 0 | 0 | 1093.6368 | 2.76E+05 |
| 082817_S4 Isoform 2 of Elastin | ELN | sp P15502-2 ELN | 62632.4 | 100.00% | 266 | 325 | 740 | 2.25% | 58.60% | AGGPFVGVGGIPG             | G | V | 99.30% | 1.77 | 0.544 | 0 | 1 | 0 | 0 | 1345.6902 | 1.23E+05 |
| 082817_S4 Isoform 2 of Elastin | ELN | sp P15502-2 ELN | 62632.4 | 100.00% | 266 | 325 | 740 | 2.25% | 58.60% | GARFPGVLPVPT              | P | G | 99.20% | 1.91 | 0.426 | 0 | 1 | 0 | 0 | 1423.8058 | 9.09E+04 |
| 082817_S4 Isoform 2 of Elastin | ELN | sp P15502-2 ELN | 62632.4 | 100.00% | 266 | 325 | 740 | 2.25% | 58.60% | AAVLGVGGAGVPPVGGIPG       | G | A | 99.70% | 1.83 | 0.476 | 0 | 1 | 0 | 0 | 1431.7957 | 1.10E+06 |
| 082817_S4 Isoform 2 of Elastin | ELN | sp P15502-2 ELN | 62632.4 | 100.00% | 266 | 325 | 740 | 2.25% | 58.60% | VPGAIPGGIAGVGTGA          | G | A | 99.70% | 1.95 | 0.432 | 0 | 1 | 0 | 0 | 1503.8533 | 3.86E+05 |
| 082817_S4 Isoform 2 of Elastin | ELN | sp P15502-2 ELN | 62632.4 | 100.00% | 266 | 325 | 740 | 2.25% | 58.60% | RPVGVGGIP                 | A | F | 99.70% | 1.95 | 0.438 | 0 | 8 | 0 | 0 | 943.5361  | 2.12E+08 |
| 082817_S4 Isoform 2 of Elastin | ELN | sp P15502-2 ELN | 62632.4 | 100.00% | 266 | 325 | 740 | 2.25% | 58.60% | APVGVGGV                  | V | A | 99.70% | 1.74 | 0.129 | 2 | 0 | 0 | 0 | 724.3990  | 1.51E+06 |
| 082817_S4 Isoform 2 of Elastin | ELN | sp P15502-2 ELN | 62632.4 | 100.00% | 266 | 325 | 740 | 2.25% | 58.60% | GGVPGV                    | A | G | 99.70% | 1.76 | 0.365 | 7 | 0 | 0 | 0 | 737.3618  | 1.15E+08 |
| 082817_S4 Isoform 2 of Elastin | ELN | sp P15502-2 ELN | 62632.4 | 100.00% | 266 | 325 | 740 | 2.25% | 58.60% | SPVPGGA                   | L | C | 99.70% | 1.86 | 0.163 | 6 | 0 | 0 | 0 | 745.3880  | 1.14E+07 |
| 082817_S4 Isoform 2 of Elastin | ELN | sp P15502-2 ELN | 62632.4 | 100.00% | 266 | 325 | 740 | 2.25% | 58.60% | PGVGSPE                   | V | A | 98.80% | 1.90 | 0.434 | 1 | 0 | 0 | 0 | 755.2935  | 2.35E+05 |
| 082817_S4 Isoform 2 of Elastin | ELN | sp P15502-2 ELN | 62632.4 | 100.00% | 266 | 325 | 740 | 2.25% | 58.60% | FPVGVGV                   | G | G | 98.80% | 1.94 | 0.417 | 1 | 0 | 0 | 0 | 779.4087  | 1.98E+06 |
| 082817_S4 Isoform 2 of Elastin | ELN | sp P15502-2 ELN | 62632.4 | 100.00% | 266 | 325 | 740 | 2.25% | 58.60% | GLVGLVGG                  | A | G | 99.70% | 1.69 | 0.145 | 1 | 0 | 0 | 0 | 799.4675  | 7.85E+05 |
| 082817_S4 Isoform 2 of Elastin | ELN | sp P15502-2 ELN | 62632.4 | 100.00% | 266 | 325 | 740 | 2.25% | 58.60% | GGVGVGGV                  | L | G | 99.70% | 1.65 | 0.177 | 1 | 0 | 0 | 0 | 811.4674  | 1.37E+06 |
| 082817_S4 Isoform 2 of Elastin | ELN | sp P15502-2 ELN | 62632.4 | 100.00% | 266 | 325 | 740 | 2.25% | 58.60% | FPVGVGV                   | G | G | 99.00% | 1.78 | 0.557 | 1 | 0 | 0 | 0 | 836.4302  | 5.15E+06 |
| 082817_S4 Isoform 2 of Elastin | ELN | sp P15502-2 ELN | 62632.4 | 100.00% | 266 | 325 | 740 | 2.25% | 58.60% | PGVFPVGV                  | V | V | 99.70% | 1.84 | 0.302 | 5 | 0 | 0 | 0 | 841.4205  | 5.92E+06 |
| 082817_S4 Isoform 2 of Elastin | ELN | sp P15502-2 ELN | 62632.4 | 100.00% | 266 | 325 | 740 | 2.25% | 58.60% | GAGVFPVGV                 | V | G | 99.70% | 1.63 | 0.331 | 1 | 0 | 0 | 0 | 865.4204  | 3.97E+05 |
| 082817_S4 Isoform 2 of Elastin | ELN | sp P15502-2 ELN | 62632.4 | 100.00% | 266 | 325 | 740 | 2.25% | 58.60% | PGVGVGGV                  | L | A | 99.70% | 1.58 | 0.351 | 2 | 0 | 0 | 0 | 866.4044  | 6.38E+06 |
| 082817_S4 Isoform 2 of Elastin | ELN | sp P15502-2 ELN | 62632.4 | 100.00% | 266 | 325 | 740 | 2.25% | 58.60% | GGVPGVGV                  | A | G | 99.70% | 1.81 | 0.445 | 4 | 0 | 0 | 0 | 893.4517  | 4.07E+07 |
| 082817_S4 Isoform 2 of Elastin | ELN | sp P15502-2 ELN | 62632.4 | 100.00% | 266 | 325 | 740 | 2.25% | 58.60% | GVPGVGGV                  | A | G | 99.70% | 1.69 | 0.108 | 3 | 0 | 0 | 0 | 894.5045  | 7.91E+06 |
| 082817_S4 Isoform 2 of Elastin | ELN | sp P15502-2 ELN | 62632.4 | 100.00% | 266 | 325 | 740 | 2.25% | 58.60% | FPVGVGGV                  | T | A | 99.70% | 1.95 | 0.193 | 4 | 0 | 0 | 0 | 913.5143  | 3.42E+0  |
